# Supplementary material for: Comparison Between Aspirin and Clopidogrel in Secondary Stroke Prevention Based on Real‐World Data
Source: PubMed Central journal article supplement — J Am Heart Assoc. 2018 Sep 28;7(19):e009856. doi: 10.1161/JAHA.118.009856 (PMC6404870; doi:10.1161/jaha.118.009856), 2018-09-28
Supplement: JAH3-7-e009856-s001.pdf [file JAH3-7-e009856-s001.pdf]

# **SUPPLEMENTAL MATERIAL**

## Appendix

### List of Taiwan Stroke Registry Investigators:

**China Medical University Hospital:** Chung-Hsiang Liu (Principal Investigator), Chon-Haw Tsai, Wei-Shih Huang, Chung-Ta Lu, Tzung-Chang Tsai, Chun-Hung Tseng, Kang-Hsu Lin, Woei-Cherng Shyu, Yu-Wan Yang, Yen-Liang Liu, Der-Yang Cho, Chun-Chung Chen

**National Taiwan University Hospital:** Jiann-Shing Jeng (Principal Investigator), Sung-Chun Tang, Li-Kai Tsai, Shin-Joe Yeh, Chih-Hao Chen, Hsin-Hsi Tsai

**E-Da Hospital:** Jie-Yuan Li (Principle Investigator), Han-Jung Chen, Kan Lu, Shih-Pin Hsu, Hung-Chang Kuo, Jung-Chi Tsou, Yan-Tang Wang, Yi-Cheng Tai, Meng-Tsang Hsieh, Po-Chao Liliang, Cheng-Loong Liang, Hao-Kuang Wang, Yu-Tun Tsai, Kuo-Wei Wang, Jui-Sheng Chen, Po-Yuan Chen, Yi-Ching Wang

**National Cheng Kung University Hospital:** Chih-Hung Chen (Principal Investigator), Pi-Shan Sung, Han-Chieh Hsieh, Hui-Chen Su

**Shin Kong WHS Memorial Hospital:** Hou-Chang Chiu (Principal Investigator), Li-Ming Lien, Wei-Hung Chen, Chyi-Huey Bai, Tzu-Hsuan Huang, Chi-Jeong Lau, Ya-Ying Wu, Hsu-Ling Yeh, Anna Chang

**Kaohsiung Veterans General Hospital:** Ching-Huang Lin (Principal Investigator), Cheng-Chang Yen

**Kaohsiung Medical University Chung-Ho Memorial Hospital:** Ruey-Tay Lin (Principal Investigator), Chun-Hung Chen, Gim-Thean Khor, A-Ching Chao, Hsiu-Fen Lin, Poyin Huang

**Chi Mei Medical Center:** Huey-Juan Lin (Principal Investigator), Der-Shin Ke, Chia-Yu Chang, Poh-Shiow Yeh, Kao-Chang Lin, Tain-Junn Cheng, Chih-Ho Chou, Chun-Ming Yang, Hsiu-Chu Shen

**Chung Shan Medical University Hospital:** An-Chih Chen (Principal Investigator), Shih-Jei Tsai, Tsong-Ming Lu, Sheng-Ling Kung, Mei-Ju Lee, Hsi-Hsien Chou

**Show Chwan Memorial Hospital:** Wei-Lun Chang (Principal Investigator), Pai-Yi Chiu, Min-Hsien Hsu, Po-Chi Chan, Chau-Hsiung Pan, Hai-Ming Shoung, Yi-Chen Lo, Fu-Hwa Wang, Wei-Chieh Chang

**Cheng Hsin General Hospital:** Ta-Chang Lai (Principal Investigator), Jiu-Haw Yin, Chung-Jen Wang, Kai-Chen Wang, Li-Mei Chen, Jong-Chyou Deng

**En Chu Kong Hospital:** Yu Sun (Principal Investigator), Chien-Jung Lu, Cheng-Huai Lin, Chieh-Cheng Huang, Chang-Hsiu Liu, Hoi-Fong Chan

**Far Eastern Memorial Hospital:** Siu-Pak Lee (Principal Investigator)

**Kuang Tien General Hospital:** Ming-Hui Sun (Principal Investigator),

Li-Ying Ke

**Taichung Veterans General Hospital:** Po-Lin Chen (Principal Investigator),  
Yu-Shan Lee

**Ditmanson Medical Foundation Chiayi Christian Hospital:** Sheng-Feng Sung  
(Principal Investigator), Cheung-Ter Ong, Chi-Shun Wu, Yung-Chu Hsu, Yu-  
Hsiang Su, Ling-Chien Hung

**Tri-Service General Hospital:** Jiunn-Tay Lee (Principal Investigator), Jiann-Chyun  
Lin, Yaw-Don Hsu, Jong-Chyou Denq, Giia-Sheun Peng, Chang-Hung Hsu, Chun-  
Chieh Lin, Che-Hung Yen, Chun-An Cheng, Yueh-Feng Sung, Yuan-Liang Chen,  
Ming-Tung Lien, Chung-Hsing Chou, Chia-Chen Liu, Fu-Chi Yang, Yi-Chung Wu,  
An-Chen Tso, Yu- Hua Lai, Chun-I Chiang, Chia-Kuang Tsai, Meng-Ta Liu,  
Ying-Che Lin, Yu-Chuan Hsu

**Cathay General Hospital:** Tsuey-Ru Chiang (Principal Investigator), Pai-Hao Huang,  
Pin-Wen Liao, Mei-Ching Lee, Jen-Tse Chen, Sian-King Lie

**Changhua Christian Hospital:** Mu-Chien Sun (Principal Investigator), Pi-Ju Hsiao,  
Wei-Liang Chen, Ta-Cheng Chen, Chen-Shu Chang, Chien-Hsu Lai, Chieh-Sen  
Chuang, Yen-Yu Chen

**Taipei Tzu Chi Hospital, Buddhist Tzu Chi Medical Foundation, New Taipei  
City, Taiwan:** Shinn-Kuang Lin, (Principal investigator), Yu-Chin Su, Jen-Lun  
Shiao, Fu-Yi Yang, Chih-Yang Liu, Han-Lin Chiang, Guei-Chiuan Chen, Po-Jen Hsu

**Min Sheng General Hospital:** Chun-Yuan Chang (Principal Investigator), I-sheng  
Lin, Chung-Hsien Chien, Yang-Chuang Chang

**Lin Shin Hospital:** Ping-Kun Chen (Principal Investigator), Pai-Yi Chiu

**National Taiwan University Hospital Yunlin Branch:** Yu-Jen Hsiao (Principal  
Investigator), Chen-Wen Fang

**Landseed Hospital:** Yu-Wei Chen (Principal Investigator), Kuo-Ying Lee, Yun-Yu  
Lin, Chen-Hua Li, Hui-Fen Tsai, Chuan-Fa Hsieh, Chih-Dong Yang, Shiumn-Jen  
Liaw, How-Chin Liao

**Cheng Ching General Hospital:** Shoou-Jeng Yeh (Principal Investigator), Ling-Li  
Wu, Liang-Po Hsieh, Yong-Hui Lee, Chung-Wen Chen

**China Medical University Beigang Hospital:** Chih-Shan Hsu (Principal  
Investigator), Ye-Jian-Jih, Hao-Yu Zhuang, Yan-Hong Pan, Shin-An Shih

**Taipei Medical University -Wan Fang Hospital:** Chin-I Chen  
(Principal Investigator), Jia-Ying Sung, , Hsing-Yu Weng, Hao-Wen Teng, Jing-Er  
Lee, Chih-Shan Huang, Shu-Ping Chao

**Taipei Medical University Hospital:** Rey-Yue Yuan (Principal Investigator),  
, Jau- Juan Sheu, Jia-Ming Yu, Chun-Sum Ho, Ting-Chun Lin

**Kuang Tien General Hospital Dajia Division:** Shih-Chieh Yu (Principal

Investigator)

**Changhua Christian Hospital Yunlin Branch:** Jiunn-Rong Chen (Principal Investigator), Song-Yen Tsai

**Chang Bing Show Chwan Memorial Hospital:** Cheng-Yu Wei (Principal Investigator), Chao-Hsien Hung, Chia Fang Lee, Sheng-Kung Yang, Chih-Lin Chen, Wei Lin

**Lotung Poh Ai Hospital:** Hung-Pin Tseng (Principal Investigator), Chin-Hsiung Liu, Chun-Liang Lin, Hung-Chih Lin, Pi-Tzu Chen

**Taipei Medical University - Shuang Ho Hospital:** Chaur-Jong Hu (Principal Investigator), Lung Chan, Nai-Fang Chi from Department of Neurology, Shuang-Ho Hospital, School of Medicine, College of Medicine, Taipei Medical University, New Taipei City

**Taipei Veterans General Hospital & National Yang-Ming University School of Medicine:** Chang-Ming Chern (Principal Investigator), Chun-Jen Lin, Shuu-Jiun Wang, Li-Chi Hsu, Wen-Jang Wong, I-Hui Lee, Der-Jen Yen, Ching-Piao Tsai, Shang-Yeong Kwan, Bing-Wen Soong, Shih-Pin Chen, Kwong-Kum Liao, Kung-Ping Lin, Chien Chen, Din-E Shan, Jong-Ling Fuh, Pei-Ning Wang, Yi-Chung Lee, Yu-Hsiang Yu, Hui-Chi Huang, Jui-Yao Tsai

**Chi Mei Medical Center, Liouying:** Ming-Hsiu Wu (Principle Investigator), Szu-Yi Chiang, Chiung-Yao Wang

**Buddhist Dalin Tzu Chi General Hospital:** Ming-Chin Hsu (Principal Investigator)

**St. MARTIN DE PORRES HOSPITAL:** Chien-Chung Chen (Principal Investigator), Po-Yen Yeh, Yu-Tai Tsai, Ko-Yi Wang

**Tainan Sin-Lau Hospital:** Tsang-Shan Chen (Principal Investigator), Cheng-Yang Hsieh, Wei-Fen Chen

**Cardinal Tien Hospital:** Ping-Keung Yip (Principal Investigator), Vinchi Wang, Kaw-Chen Wang, Chung-Fen Tsai, Chao-Ching Chen, Chih-Hao Chen, Yi-Chien Liu, Shao-Yuan Chen, Zi-Hao Zhao, Zhi-Peng Wei

**Yumin Medical Corporation Yumin Hospital:** Shey-Lin Wu (Principal Investigator)

**Kaohsiung Municipal Hsiao-kang Hospital:** Ching-Kuan Liu (Principal Investigator)

**Wei Gong Memorial Hospital:** Ryh-Huei Lin (Principal Investigator), Ching-Hua Chu

**Taipei City Hospital Ren Ai Branch:** Sui-Hing Yan (Principal Investigator), Yi-Chun Lin, Pei-Yun Chen, Sheng-Huang Hsiao

**National Taiwan University Hospital Hsin-Chu Branch:** Bak-Sau Yip (Principal Investigator), Pei-Chun Tsai, Ping-Chen Chou, Tsam-Ming Kuo, Yi-Chen Lee, Yi-Pin Chiu, Kun-Chang Tsai

**Taichung Hospital Department of Health : Yi-Sheng Liao (Principal Investigator)**

**Tainan Municipal An-Nan Hospital-China Medical University: Ming-Jun  
Tsai (Principal Investigator), Hsin-Yi Kao**

**Table S1. The correlation matrices of the variables for one-year mortality by Cox model.**

|                        | TOAST Subtype |         |                        |         |         |                |                   |                       |              |                   |              |                  |                     |                        |                          |          |         |             |              |                           |         |
|------------------------|---------------|---------|------------------------|---------|---------|----------------|-------------------|-----------------------|--------------|-------------------|--------------|------------------|---------------------|------------------------|--------------------------|----------|---------|-------------|--------------|---------------------------|---------|
| Aspirin / Clopidogrel  | Age           | BMI     | Hospitalization length | Male    | SVD     | Cardioembolism | Specific etiology | Undetermined etiology | Hypertension | Diabetes mellitus | Dyslipidemia | Previous CVA/TIA | Atrial fibrillation | Ischemic heart disease | Congestive heart failure | Acute MI | Smoking | Alcohol use | UGI bleeding | NIHSS scores at discharge |         |
| Aspirin / Clopidogrel  | --            | <0.0001 | <0.0001                | <0.0001 | 0.0001  | -0.0003        | 0.0002            | <0.0001               | -0.006       | 0.00001           | <0.0001      | -0.0001          | <0.0001             | -0.0004                | 0.0001                   | 0.0009   | 0.002   | -0.0001     | -0.0004      | 0.0003                    | <0.0001 |
| Age                    | <0.0001       | --      | <0.0001                | <0.0001 | <0.0001 | <0.0001        | <0.0001           | <0.0001               | <0.0001      | <0.0001           | <0.0001      | <0.0001          | <0.0001             | <0.0001                | <0.0001                  | <0.0001  | <0.0001 | <0.0001     | <0.0001      | <0.0001                   | <0.0001 |
| BMI                    | <0.0001       | <0.0001 | --                     | <0.0001 | <0.0001 | <0.0001        | <0.0001           | <0.0001               | <0.0001      | <0.0001           | <0.0001      | <0.0001          | <0.0001             | <0.0001                | <0.0001                  | -0.0002  | <0.0001 | <0.0001     | <0.0001      | <0.0001                   | <0.0001 |
| Hospitalization length | <0.0001       | <0.0001 | <0.0001                | --      | <0.0001 | <0.0001        | <0.0001           | <0.0001               | <0.0001      | <0.0001           | <0.0001      | <0.0001          | <0.0001             | <0.0001                | <0.0001                  | 0.00001  | <0.0001 | <0.0001     | <0.0001      | <0.0001                   | <0.0001 |
| Male                   | 0.0001        | <0.0001 | <0.0001                | <0.0001 | --      | 0.0003         | 0.0003            | -0.001                | -0.0003      | 0.0009            | 0.0004       | 0.0005           | -0.0002             | 0.0003                 | -0.0003                  | 0.0004   | -0.003  | -0.004      | -0.0009      | -0.0009                   | <0.0001 |
| TOAST Subtype          |               |         |                        |         |         |                |                   |                       |              |                   |              |                  |                     |                        |                          |          |         |             |              |                           |         |
| SVD                    | -0.0003       | <0.0001 | <0.0001                | <0.0001 | 0.0003  | --             | --                | --                    | --           | 0.0003            | 0.0003       | 0.00001          | -0.0001             | -0.002                 | -0.0005                  | <0.0001  | -0.002  | <0.0001     | <0.0001      | 0.0009                    | <0.0001 |
| Cardioembolism         | 0.0002        | <0.0001 | <0.0001                | <0.0001 | 0.0003  | --             | --                | --                    | --           | 0.0001            | 0.0003       | 0.0002           | -0.0003             | -0.002                 | -0.0008                  | -0.0004  | -0.0002 | 0.00001     | <0.0001      | 0.00002                   | <0.0001 |
| Specific etiology      | <0.0001       | <0.0001 | <0.0001                | <0.0001 | -0.001  | --             | --                | --                    | --           | -0.002            | -0.0005      | -0.0006          | <0.0001             | 0.0003                 | -0.0007                  | 0.00008  | -0.002  | 0.00005     | 0.001        | 0.003                     | <0.0001 |
| Undetermined etiology  | -0.0006       | <0.0001 | <0.0001                | <0.0001 | -0.003  | --             | --                | --                    | --           | -0.0007           | -0.0007      | -0.0003          | -0.0004             | 0.007                  | 0.0008                   | -0.001   | 0.004   | -0.0005     | 0.0004       | 0.00002                   | <0.0001 |
| Hypertension           | 0.0001        | <0.0001 | <0.0001                | <0.0001 | 0.0009  | 0.0003         | 0.0001            | -0.001                | <0.0001      | --                | -0.001       | -0.0006          | -0.0009             | <0.0001                | -0.0005                  | <0.0001  | -0.0002 | -0.0002     | -0.0002      | -0.001                    | <0.0001 |
| Diabetes mellitus      | <0.0001       | <0.0001 | <0.0001                | <0.0001 | <0.0001 | 0.0003         | 0.0003            | -0.0005               | -0.0007      | -0.001            | --           | -0.0008          | -0.0007             | -0.00003               | -0.0005                  | -0.00004 | -0.002  | <0.0001     | <0.0001      | 0.0004                    | <0.0001 |
| Dyslipidemia           | -0.001        | <0.0001 | <0.0001                | <0.0001 | <0.0001 | 0.0001         | 0.00002           | -0.0006               | -0.0003      | -0.0006           | -0.00008     | --               | -0.0001             | <0.0001                | -0.0002                  | <0.0001  | 0.0005  | -0.0006     | <0.0001      | <0.0001                   | <0.0001 |
| Previous CVA/TIA       | 0.0006        | <0.0001 | <0.0001                | <0.0001 | -0.002  | -0.0001        | -0.0003           | <0.0001               | -0.0004      | -0.0009           | -0.007       | -0.0001          | --                  | -0.0005                | -0.0008                  | <0.0001  | 0.001   | <0.0001     | 0.0003       | 0.0007                    | <0.0001 |



**Table S2. The correlation matrices of the variables for one-year stroke recurrence by Cox model.**

|                        | TOAST Subtype |         |                        |         |         |                |                   |                       |              |                   |              |                  |                     |                        |                          |          |         |             |              |                           |         |
|------------------------|---------------|---------|------------------------|---------|---------|----------------|-------------------|-----------------------|--------------|-------------------|--------------|------------------|---------------------|------------------------|--------------------------|----------|---------|-------------|--------------|---------------------------|---------|
| Aspirin / Clopidogrel  | Age           | BMI     | Hospitalization length | Male    | SVD     | Cardioembolism | Specific etiology | Undetermined etiology | Hypertension | Diabetes mellitus | Dyslipidemia | Previous CVA/TIA | Atrial fibrillation | Ischemic heart disease | Congestive heart failure | Acute MI | Smoking | Alcohol use | UGI bleeding | NIHSS scores at discharge |         |
| Aspirin / Clopidogrel  | --            | <0.0001 | <0.0001                | <0.0001 | <0.0001 | -0.0001        | <0.0001           | -0.0001               | -0.0003      | <0.0001           | <0.0001      | <0.0001          | 0.0004              | <0.0001                | 0.0006                   | 0.0001   | 0.0008  | <0.0001     | -0.0002      | 0.003                     | <0.0001 |
| Age                    | <0.0001       | --      | <0.0001                | <0.0001 | <0.0001 | <0.0001        | <0.0001           | <0.0001               | <0.0001      | <0.0001           | <0.0001      | <0.0001          | <0.0001             | <0.0001                | <0.0001                  | <0.0001  | <0.0001 | <0.0001     | <0.0001      | <0.0001                   | <0.0001 |
| BMI                    | <0.0001       | <0.0001 | --                     | <0.0001 | <0.0001 | <0.0001        | <0.0001           | <0.0001               | <0.0001      | <0.0001           | <0.0001      | <0.0001          | <0.0001             | <0.0001                | <0.0001                  | <0.0001  | <0.0001 | <0.0001     | <0.0001      | <0.0001                   | <0.0001 |
| Hospitalization length | <0.0001       | <0.0001 | <0.0001                | --      | <0.0001 | <0.0001        | <0.0001           | <0.0001               | <0.0001      | <0.0001           | <0.0001      | <0.0001          | <0.0001             | <0.0001                | <0.0001                  | <0.0001  | <0.0001 | <0.0001     | <0.0001      | <0.0001                   | <0.0001 |
| Male                   | <0.0001       | <0.0001 | <0.0001                | <0.0001 | --      | 0.0001         | <0.0001           | -0.0003               | -0.0002      | 0.0004            | 0.0002       | 0.0003           | -0.0002             | <0.0001                | -0.0003                  | <0.0001  | -0.0008 | -0.002      | -0.0005      | -0.0002                   | <0.0001 |
| TOAST Subtype          |               |         |                        |         |         |                |                   |                       |              |                   |              |                  |                     |                        |                          |          |         |             |              |                           |         |
| SVD                    | -0.0001       | <0.0001 | <0.0001                | <0.0001 | 0.0001  | --             | --                | --                    | --           | 0.0002            | 0.0002       | <0.0001          | -0.0001             | -0.0002                | -0.0002                  | -0.0003  | -0.003  | <0.0001     | 0.0001       | 0.0001                    | <0.0001 |
| Cardioembolism         | <0.0001       | <0.0001 | <0.0001                | <0.0001 | <0.0001 | --             | --                | --                    | --           | 0.0001            | <0.0001      | <0.0001          | <0.0001             | -0.002                 | -0.0004                  | -0.0003  | -0.002  | <0.0001     | <0.0001      | <0.0001                   | <0.0001 |
| Specific etiology      | -0.0001       | <0.0001 | <0.0001                | <0.0001 | -0.0003 | --             | --                | --                    | --           | -0.0006           | -0.0006      | -0.0002          | -0.0001             | -0.0005                | -0.0004                  | -0.0006  | -0.003  | 0.0001      | <0.0001      | 0.002                     | <0.0001 |
| Undetermined etiology  | -0.0003       | <0.0001 | <0.0001                | <0.0001 | -0.0002 | --             | --                | --                    | --           | -0.0001           | -0.0003      | -0.0002          | <0.0001             | 0.01                   | 0.0005                   | -0.0009  | 0.0004  | -0.0002     | 0.0002       | -0.0009                   | <0.0001 |
| Hypertension           | <0.0001       | <0.0001 | <0.0001                | <0.0001 | 0.0004  | 0.0002         | 0.0001            | -0.0007               | <0.0001      | --                | -0.0006      | -0.0004          | -0.0006             | -0.0002                | -0.0003                  | -0.0001  | 0.0006  | -0.0001     | -0.0001      | -0.0004                   | <0.0001 |
| Diabetes mellitus      | <0.0001       | <0.0001 | <0.0001                | <0.0001 | 0.0002  | 0.0002         | <0.0001           | -0.0006               | -0.0003      | -0.0006           | --           | -0.0004          | -0.0003             | <0.0001                | -0.0003                  | -0.0003  | -0.0003 | <0.0001     | <0.0001      | <0.0001                   | <0.0001 |
| Dyslipidemia           | <0.0001       | <0.0001 | <0.0001                | <0.0001 | 0.0003  | <0.0001        | <0.0001           | -0.0002               | -0.0002      | -0.0006           | -0.0004      | --               | <0.0001             | <0.0001                | -0.0001                  | <0.0001  | <0.0001 | -0.003      | <0.0001      | <0.0001                   | <0.0001 |
| Previous CVA/TIA       | 0.0004        | <0.0001 | <0.0001                | <0.0001 | -0.0002 | -0.0001        | <0.0001           | -0.0001               | <0.0001      | -0.0006           | -0.0003      | <0.0001          | --                  | <0.0001                | <0.0001                  | <0.0001  | 0.0003  | <0.0001     | 0.00001      | 0.00002                   | <0.0001 |
